# Supplementary material for: Integrating Reinforcement Learning and Monte Carlo Tree Search for enhanced neoantigen vaccine design
Source: PubMed Central journal article supplement (PMC11107383; doi:10.1093/bib/bbae247), 2024-05-20
Supplement: supplementary_figures_bbae247.pdf [file supplementary_figures_bbae247.pdf]

**Supplementary Figure Legends:**

**Supplementary Figure 1: Comparative analysis of UltraMutate and AOMP for the pairing of HLA-A\*26:01 with the peptide TLHGPTPLL.**

**Supplementary Figure 2: Comparative analysis of UltraMutate and AOMP for the pairing of HLA-C\*06:02 with the peptide QKWTVEESEWV.**

**Supplementary Figure 3: Binding evaluation of the pHLA complexes for HCMV peptides.**  
Visualization of the pHLA complexes for the original (KEVNSQLSL) and mutated (FEVNSQLSL) peptides using PyMOL, with the statistics of the bonding interactions at the bottom.

# Supplementary Figure 1

**a**

| According to Accumulative attention score |                              | According to the contribution ratio |                    |
|-------------------------------------------|------------------------------|-------------------------------------|--------------------|
| Ranked amino acid site                    | Accumulative attention score | Ranked amino acid site              | Contribution ratio |
| 1T                                        | 834.18                       | 1T                                  | 0.17               |
| <b>9L</b>                                 | <b>767.13</b>                | <b>9L</b>                           | <b>0.14</b>        |
| 2L                                        | 595.99                       | 2L                                  | 0.14               |
| 3H                                        | 364.78                       | 8L                                  | 0.12               |
| 6T                                        | 307.93                       | 4G                                  | 0.11               |
| 4G                                        | 245.70                       | 3H                                  | 0.11               |
| 7P                                        | 199.16                       | 7P                                  | 0.08               |
| 8L                                        | 168.49                       | 6T                                  | 0.07               |
| 5P                                        | 141.88                       | 5P                                  | 0.07               |

**b**

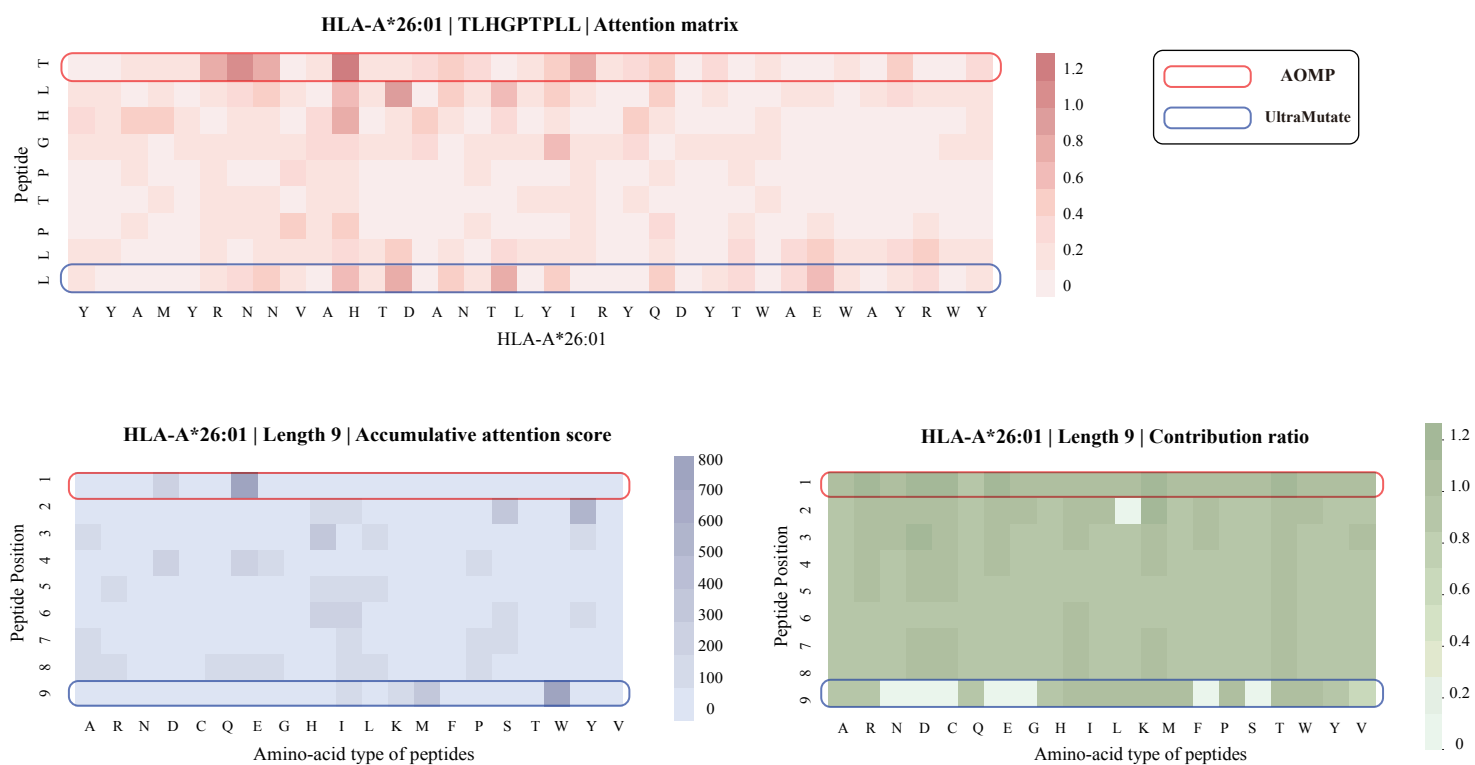

# Supplementary Figure 2

a

| According to Accumulative attention score |                              | According to the contribution ratio |                    |
|-------------------------------------------|------------------------------|-------------------------------------|--------------------|
| Ranked amino acid site                    | Accumulative attention score | Ranked amino acid site              | Contribution ratio |
| 2K                                        | 48.94                        | 3W                                  | 0.14               |
| 11V                                       | 39.72                        | 2K                                  | 0.13               |
| 3W                                        | 20.47                        | 1Q                                  | 0.11               |
| 4T                                        | 18.83                        | 10W                                 | 0.11               |
| 9E                                        | 15.66                        | 8S                                  | 0.09               |
| 1Q                                        | 15.53                        | 9E                                  | 0.08               |
| 5V                                        | 12.82                        | 11V                                 | 0.08               |
| 10W                                       | 11.47                        | 6E                                  | 0.08               |
| 8S                                        | 11.41                        | 7E                                  | 0.08               |
| 6E                                        | 11.32                        | 5V                                  | 0.06               |
| 7E                                        | 10.60                        | 4T                                  | 0.04               |

b

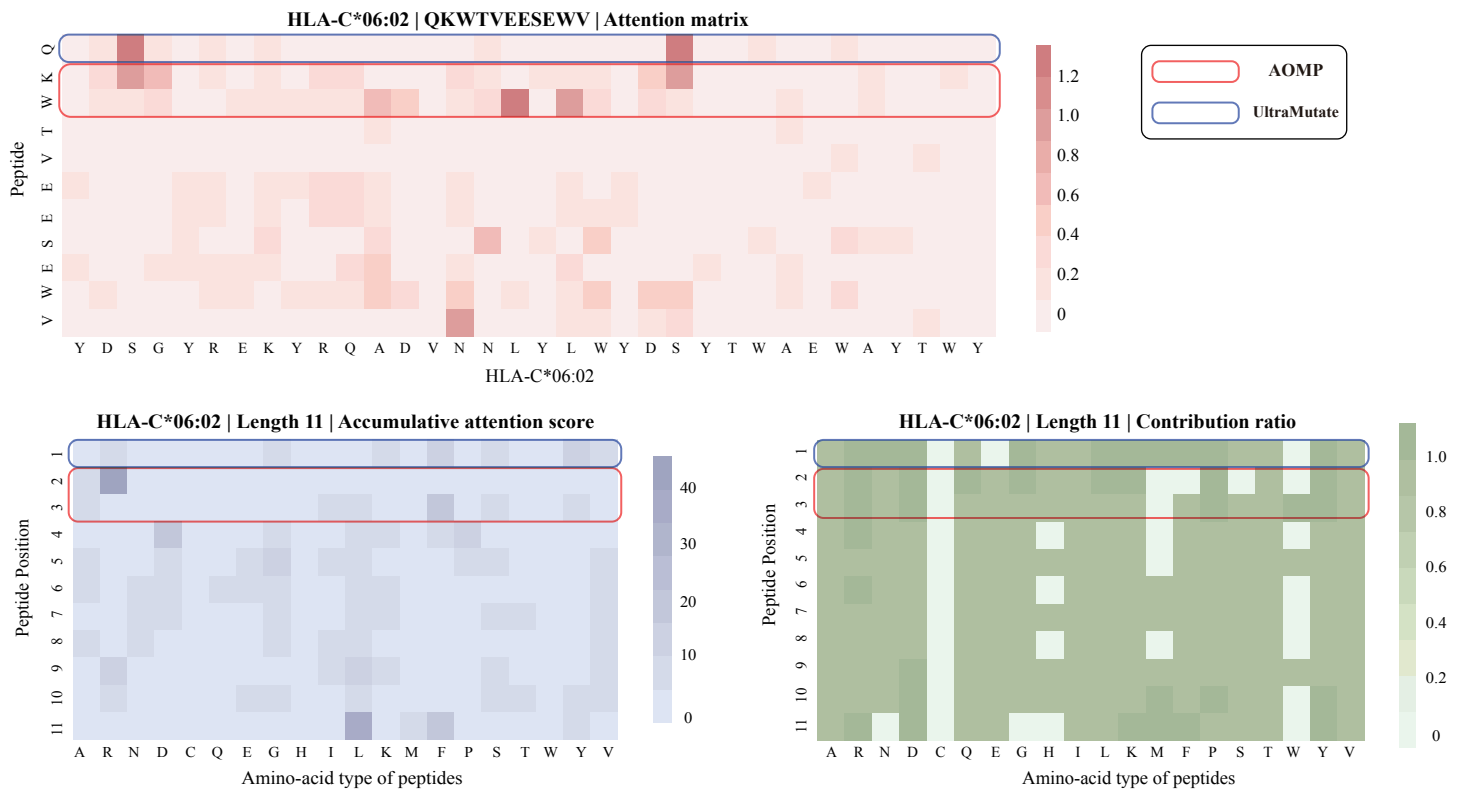

### Supplementary Figure 3

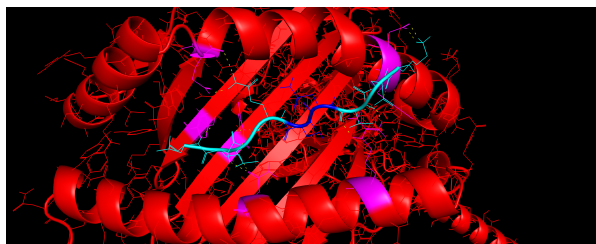

Original Peptide (KEVNSQLSL)

|                                 |    |
|---------------------------------|----|
| Hydrogen Bonds                  | 15 |
| Interacted Residuals On Peptide | 7  |
| Interacted Residuals On HLA     | 7  |

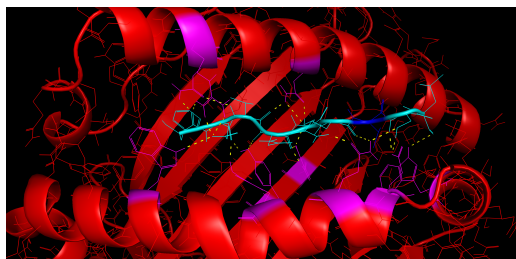

Mutated Peptide (FEVNSQLSL)

|                                 |    |
|---------------------------------|----|
| Hydrogen Bonds                  | 21 |
| Interacted Residuals On Peptide | 8  |
| Interacted Residuals On HLA     | 10 |
